# Supplementary material for: Weakened aerosol–radiation interaction exacerbating ozone pollution in eastern China since China's clean air actions
Source: Copernicus journal article supplement (doi:10.5194/acp-24-4001-2024), 2024-04-03
Supplement: Supplementary file 1 [file acp-24-4001-2024-supplement.pdf]

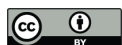

*Supplement of*

## **Weakened aerosol–radiation interaction exacerbating ozone pollution in eastern China since China’s clean air actions**

**Hao Yang et al.**

*Correspondence to:* Lei Chen ([chenlei@nuist.edu.cn](mailto:chenlei@nuist.edu.cn)) and Hong Liao ([hongliao@nuist.edu.cn](mailto:hongliao@nuist.edu.cn))

The copyright of individual parts of the supplement might differ from the article licence.

**Table S1.** WRF-Chem model configurations with main physical and chemical schemes adopted in this study.

| <b>Model set-up</b>                            | <b>Values</b>                   |
|------------------------------------------------|---------------------------------|
| Domain                                         | East Asia                       |
| Study period                                   | June and December 2017          |
| Domain size                                    | 167 × 167                       |
| Domain center                                  | 34 °N, 108 °E                   |
| Horizontal resolution                          | 27 km × 27 km                   |
| Vertical resolution                            | 32 eta levels up to 50 hPa      |
| Meteorological boundary and initial conditions | NCEP 1°×1° reanalysis data      |
| Chemical initial and boundary conditions       | CAM-Chem output                 |
| <b>Physical options</b>                        | <b>Adopted scheme</b>           |
| Microphysics scheme                            | Lin (Purdue) scheme             |
| Cumulus scheme                                 | Grell 3D ensemble scheme        |
| Boundary layer scheme                          | Yonsei University PBL scheme    |
| Surface layer scheme                           | Monin-Obukhov surface scheme    |
| Land-surface scheme                            | Unified Noah land-surface model |
| Longwave radiation scheme                      | RRTMG                           |
| Shortwave radiation scheme                     | RRTMG                           |
| <b>Chemical options</b>                        | <b>Adopted scheme</b>           |
| Gas phase chemistry                            | CBMZ                            |
| Aerosols                                       | MOSAIC                          |
| Photolysis                                     | Fast-J                          |
| Biogenic emissions                             | MEGAN                           |
| Anthropogenic emissions                        | MEIC                            |

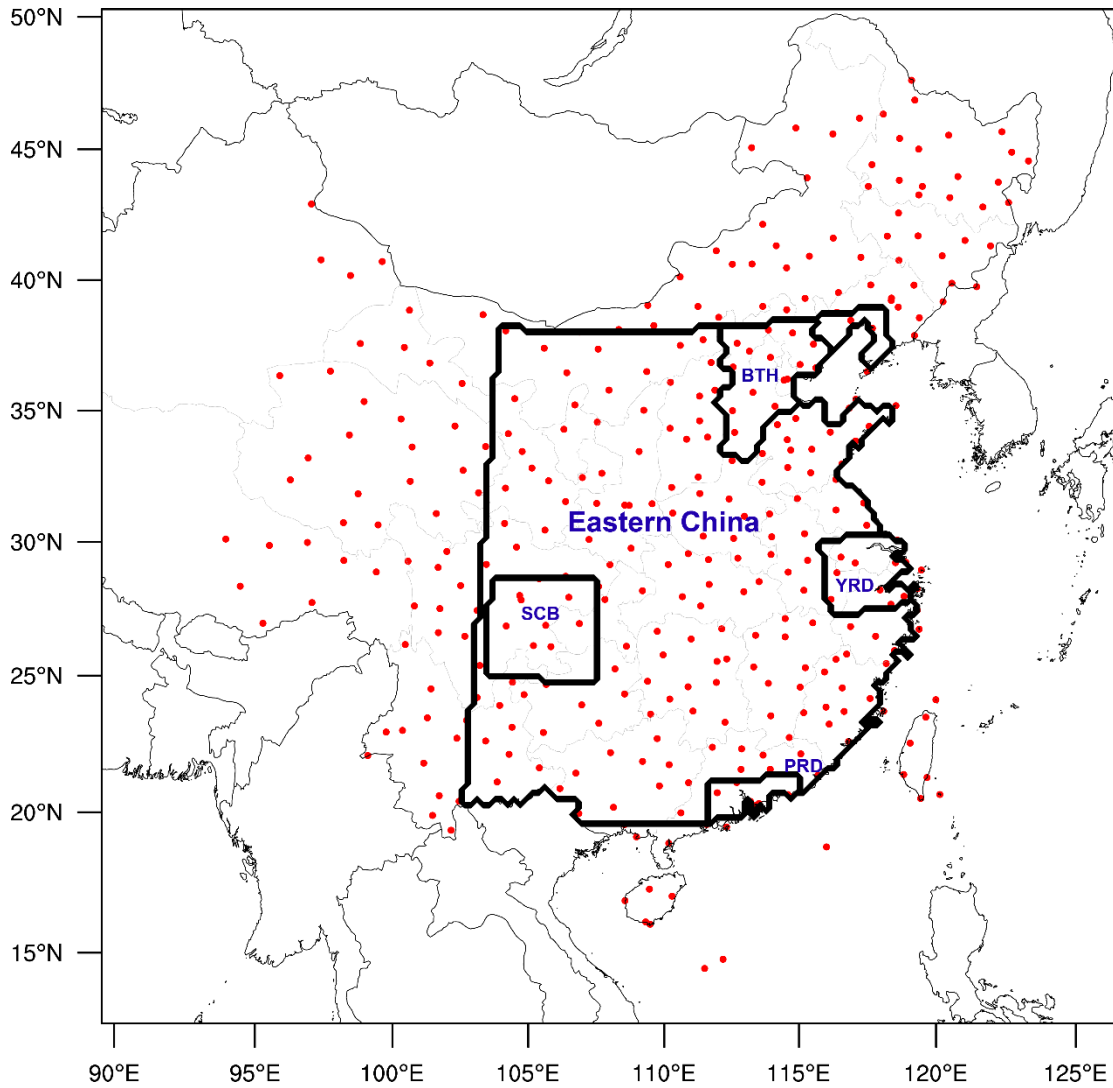

**Figure S1.** Map of the WRF-Chem simulation domain. Red dots represent meteorological monitoring sites. Five selected regions are also shown in bold black lines, including eastern China, Beijing-Tianjin-Hebei (BTH), Yangtze River Delta (YRD), Pearl River Delta (PRD), and Sichuan Basin (SCB).

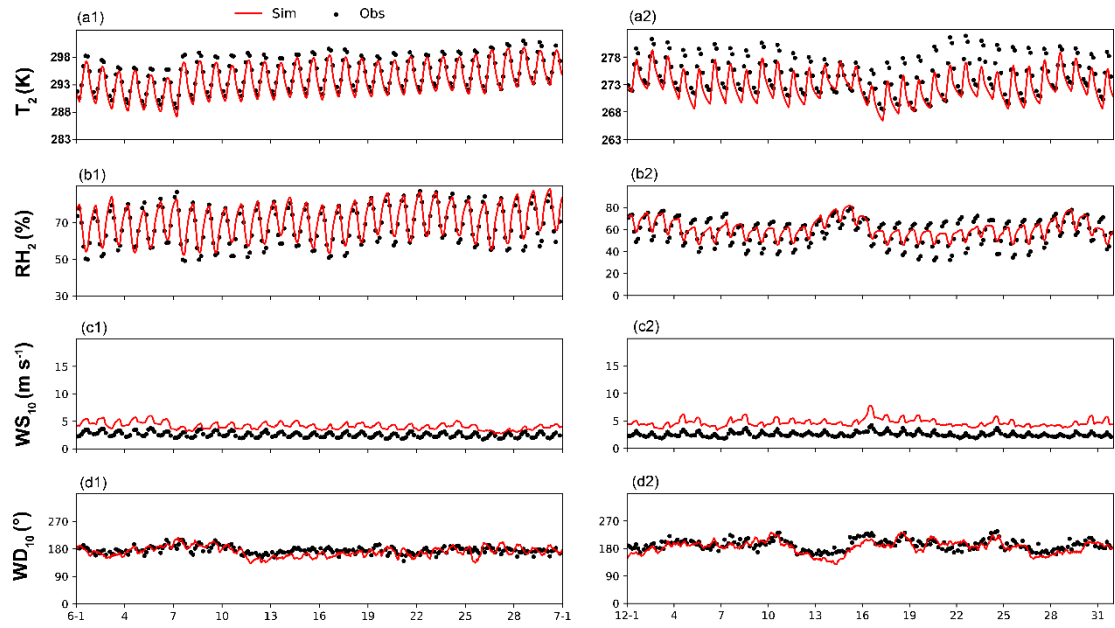

**Figure S2.** Comparison of 3-hourly observed (black dots) and hourly simulated (red lines) surface meteorological variables of **(a)** 2 m temperature ( $T_2$ ), **(b)** 2 m relative humidity ( $RH_2$ ), **(c)** 10 m wind speed ( $WS_{10}$ ), and **(d)** 10 m wind direction ( $WD_{10}$ ) averaged over 353 meteorological observation stations during summer (left column) and winter (right column) in 2017.

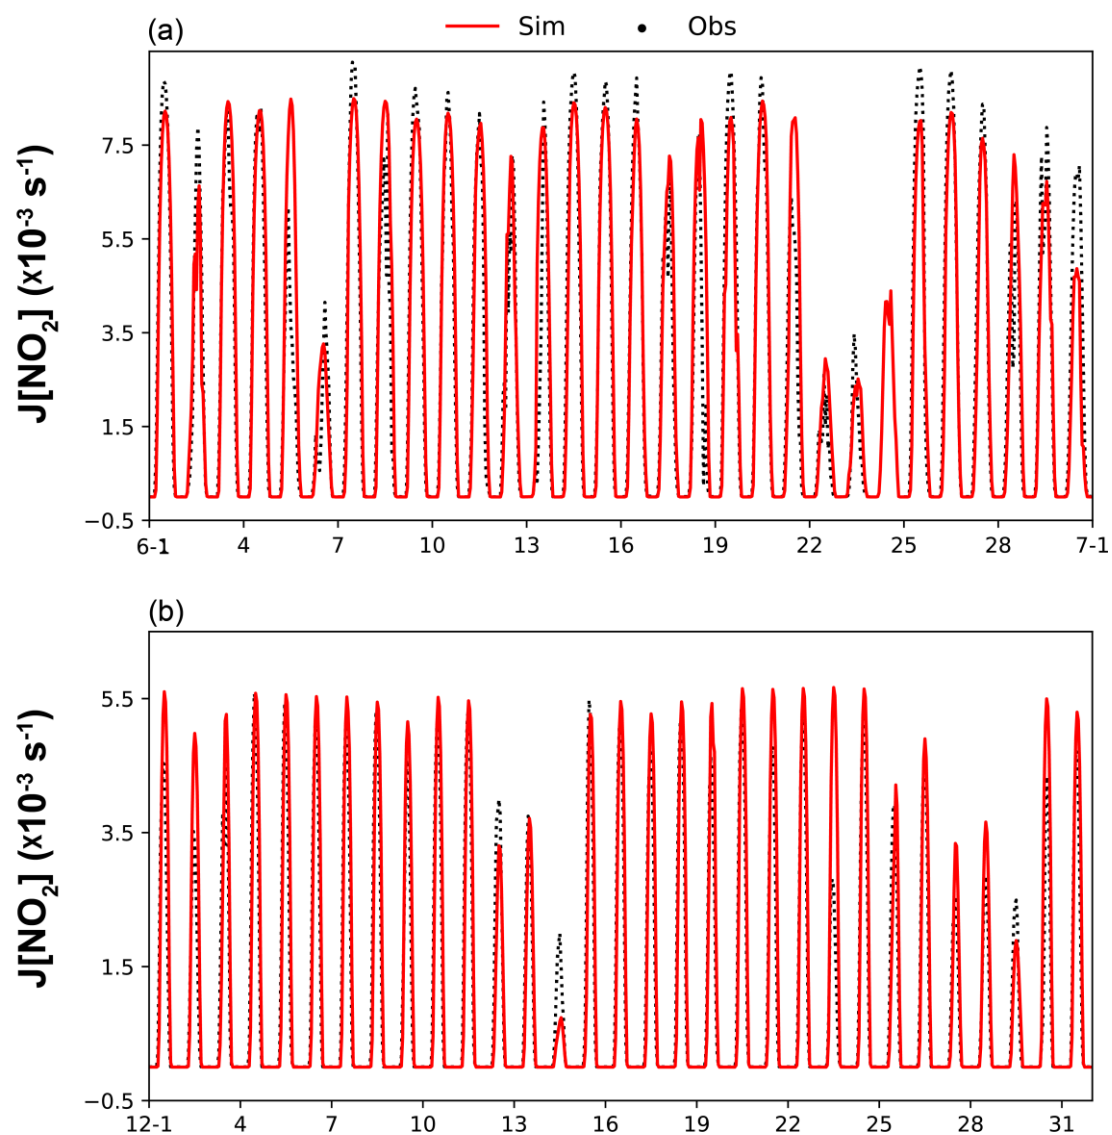

**Figure S3.** Time series of hourly observed (black dots) and simulated (red lines) surface photolysis rate of NO<sub>2</sub> ( $J[\text{NO}_2]$ ) in **(a)** summer and **(b)** winter in 2017.

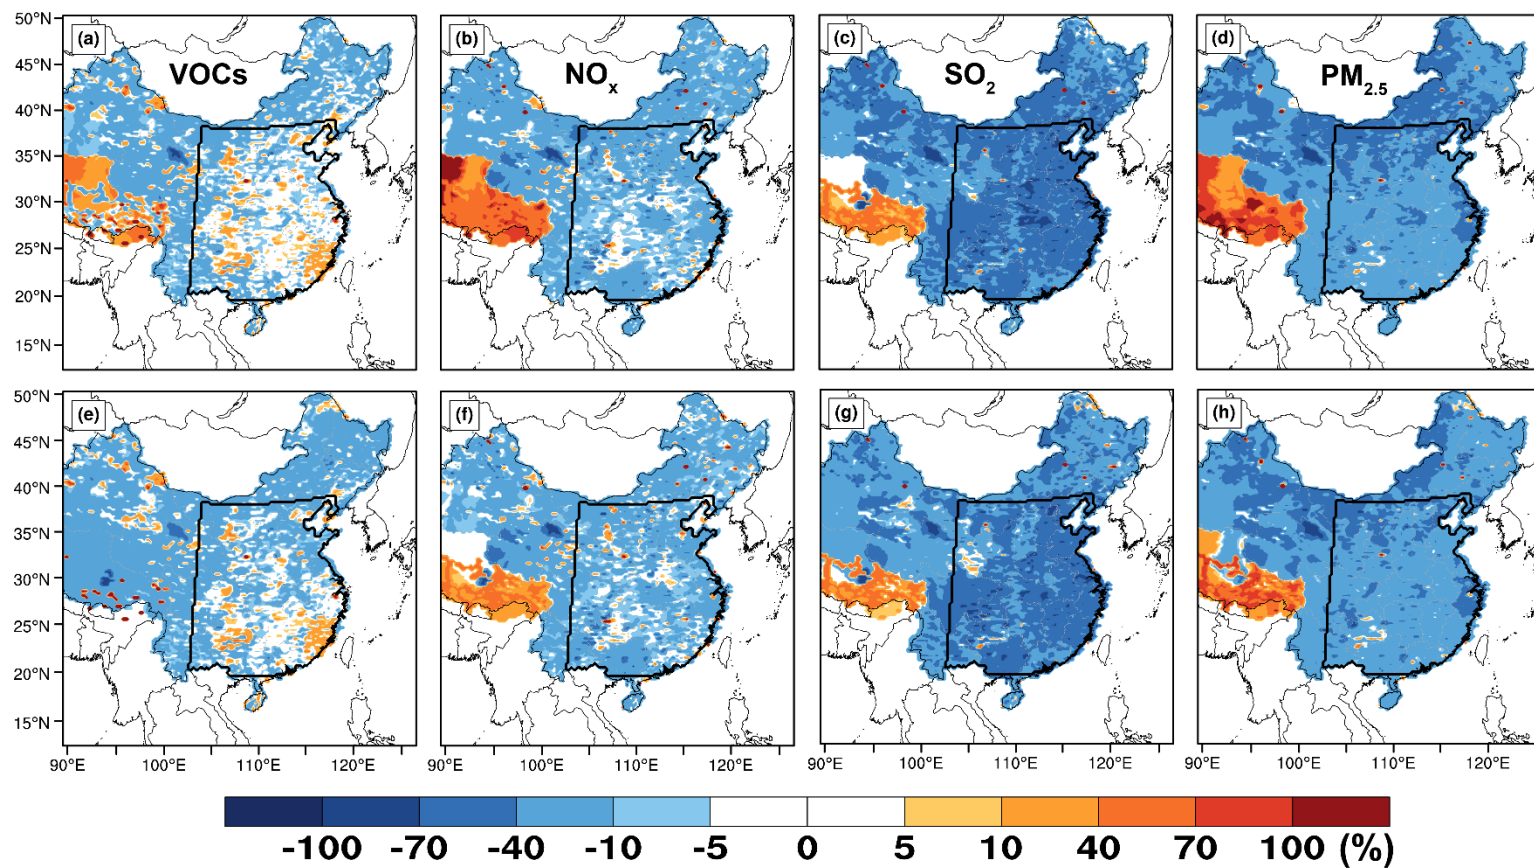

**Figure S4.** Spatial distributions of changed summer (upper) and winter (bottom) anthropogenic emissions in 2017 relative to that in 2013. (a, e) VOCs, (b, f)  $\text{NO}_x$ , (c, g)  $\text{SO}_2$  and (d, h)  $\text{PM}_{2.5}$ . The enclosed black lines represent eastern China.

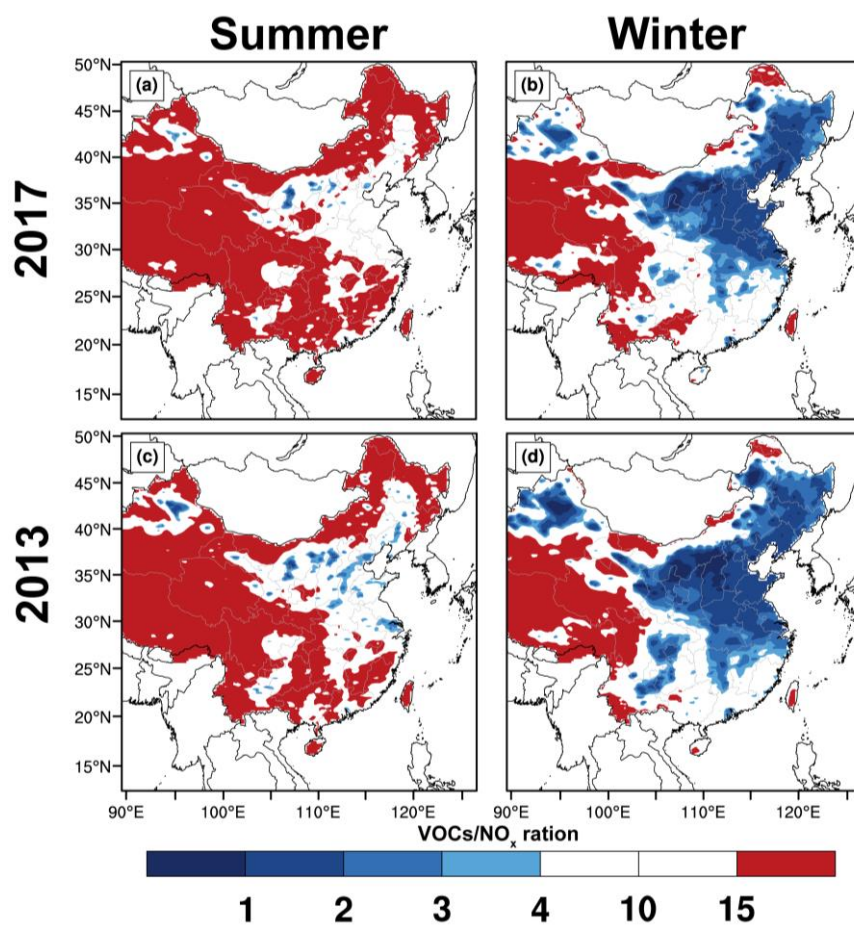

**Figure S5.** The ratios of VOCs/NO<sub>x</sub> calculated from (a, b) BASE\_17E17M, and (c, d) BASE\_13E13M during the daytime (08:00-17:00 LST) from summer (left) and winter (right).



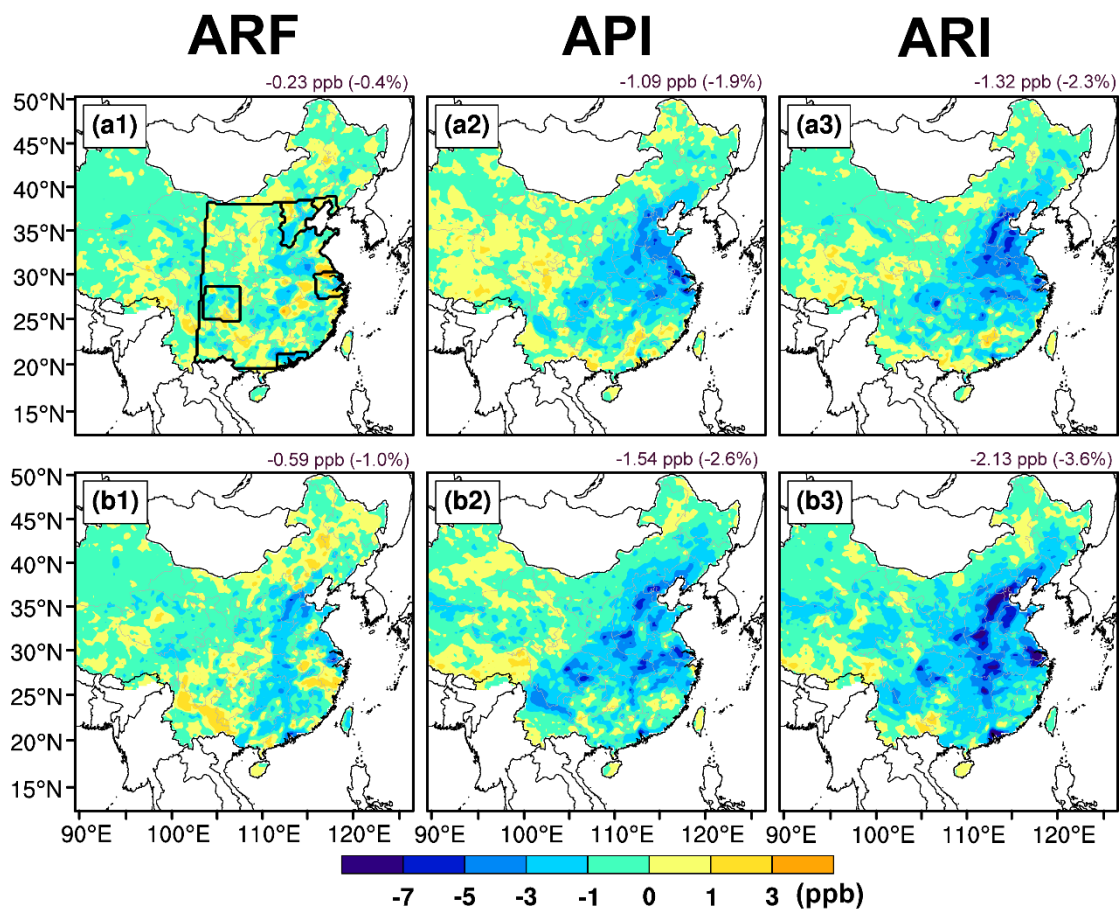

**Figure S6.** The impacts of (a1, b1) aerosol-radiation feedback (ARF), (a2, b2) aerosol-photolysis interaction (API), and (a3, b3) aerosol-radiation interaction (ARI=ARF+API) on surface-layer MDA8 O<sub>3</sub> in summer under different anthropogenic emission conditions in year 2017 (upper) and year 2013 (bottom).



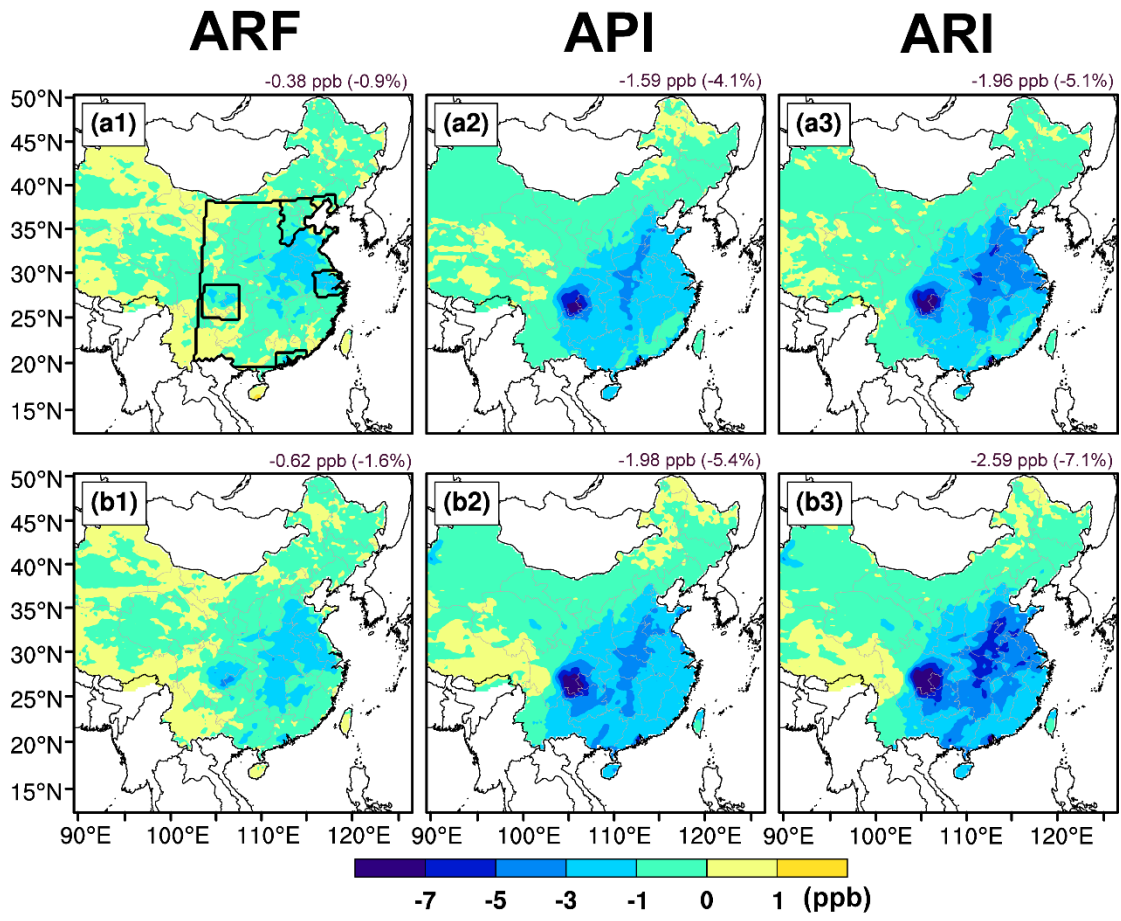

**Figure S7.** Same as Figure S6 but for winter.

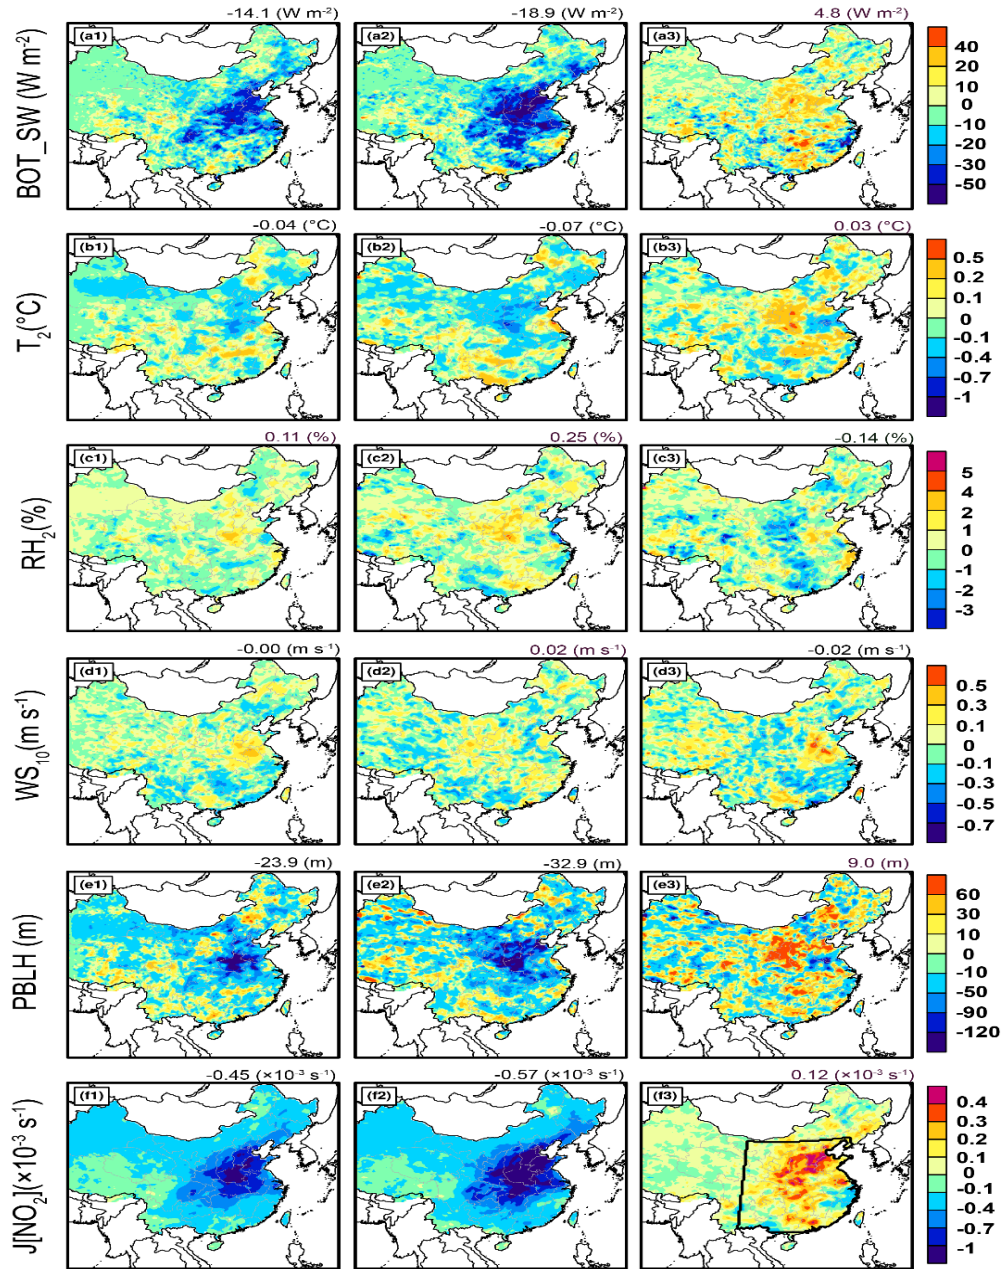

**Figure S8.** The impacts of aerosol-radiation interaction on **(a)** downward shortwave radiation at the surface (BOT\_SW), **(b)** 2-m temperature ( $T_2$ ), **(c)** 2-m relative humidity ( $RH_2$ ), **(d)** 10-m wind speed ( $WS_{10}$ ), **(e)** PBL height (PBLH), and **(f)**  $J[NO_2]$  during the daytime (08:00-17:00 LST) in summer. The **(a1-f1)** left panels show the impacts from  $\Delta O_3\_ARI_{17E}$ . The **(a2-f2)** middle panels show the impacts from  $\Delta O_3\_ARI_{13E}$ . The **(a3-f3)** right panels show the impacts from  $\Delta O_3\_ARI\_EMI$ . Detailed information about  $\Delta O_3\_ARI_{17E}$ ,  $\Delta O_3\_ARI_{13E}$ , and  $\Delta O_3\_ARI\_EMI$  can be found in Figure 1. The enclosed black line in **(f3)** represents eastern China. The mean changes over eastern China are also shown at the top of each panel.

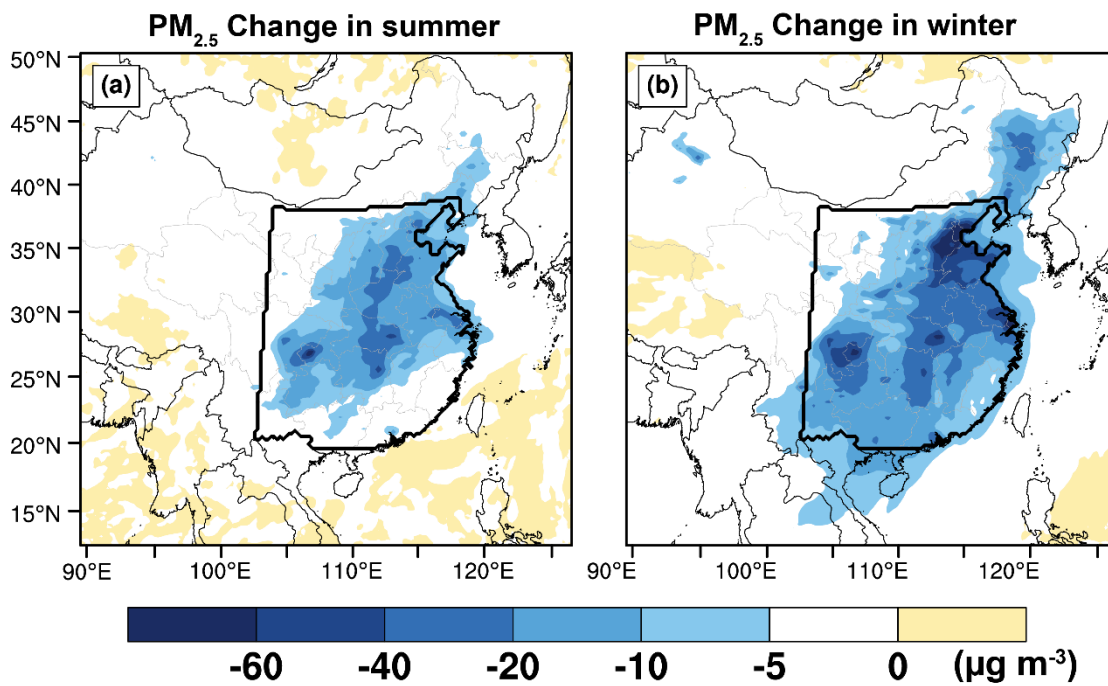

**Figure S9.** Changes in simulated PM<sub>2.5</sub> concentrations in (a) summer and (b) winter from 2013 to 2017 due to anthropogenic emission reductions.

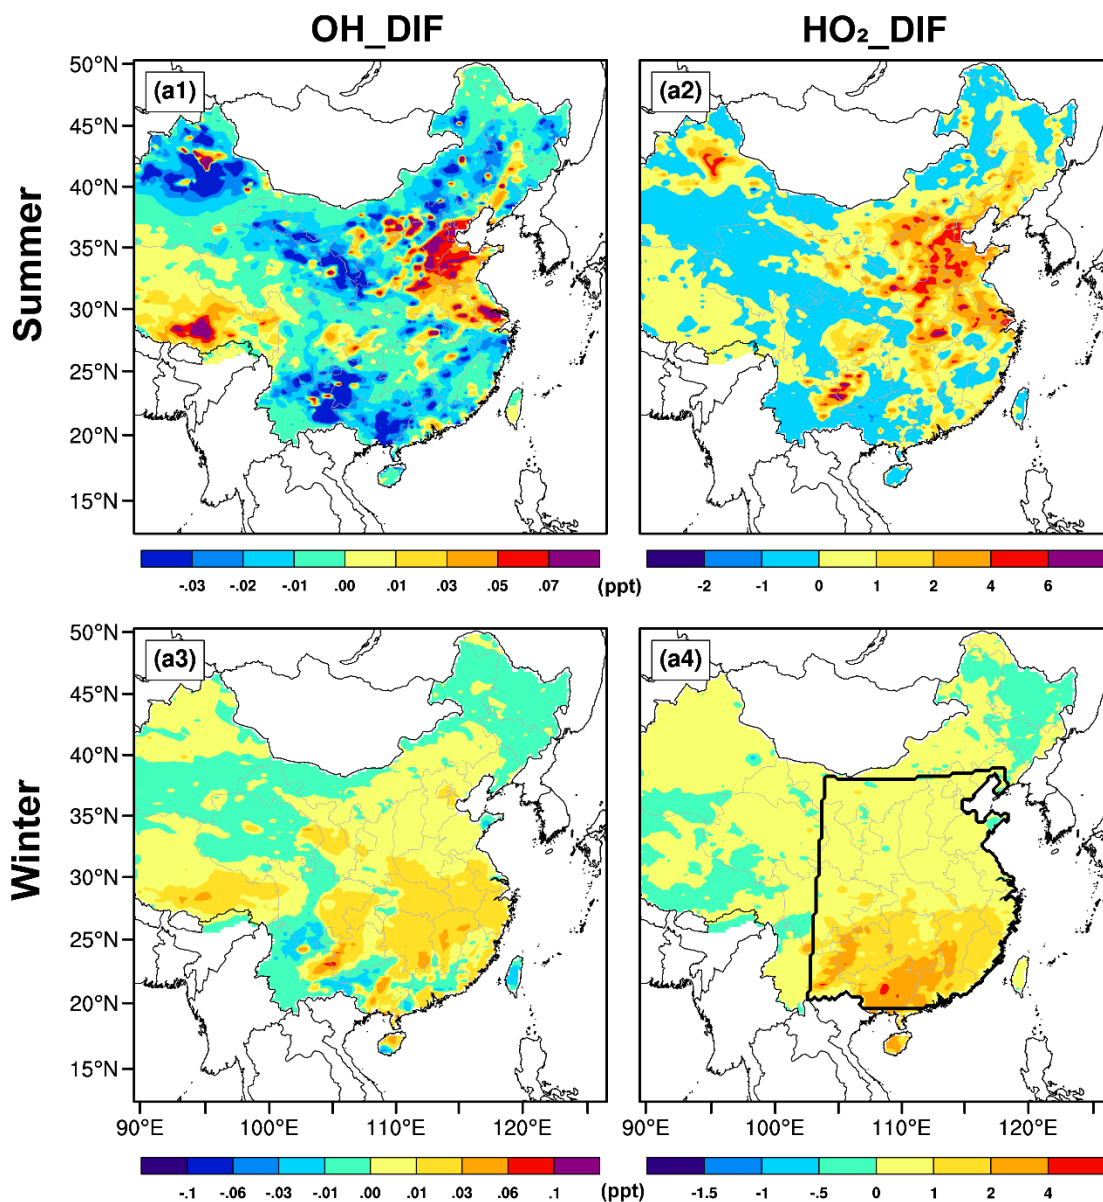

**Figure S10.** Spatial distribution of changed summer (upper) and winter (bottom) surface-layer (a1, a3) OH and (a2, a4) HO<sub>2</sub> concentrations from 2013 to 2017 due to anthropogenic emission reductions.

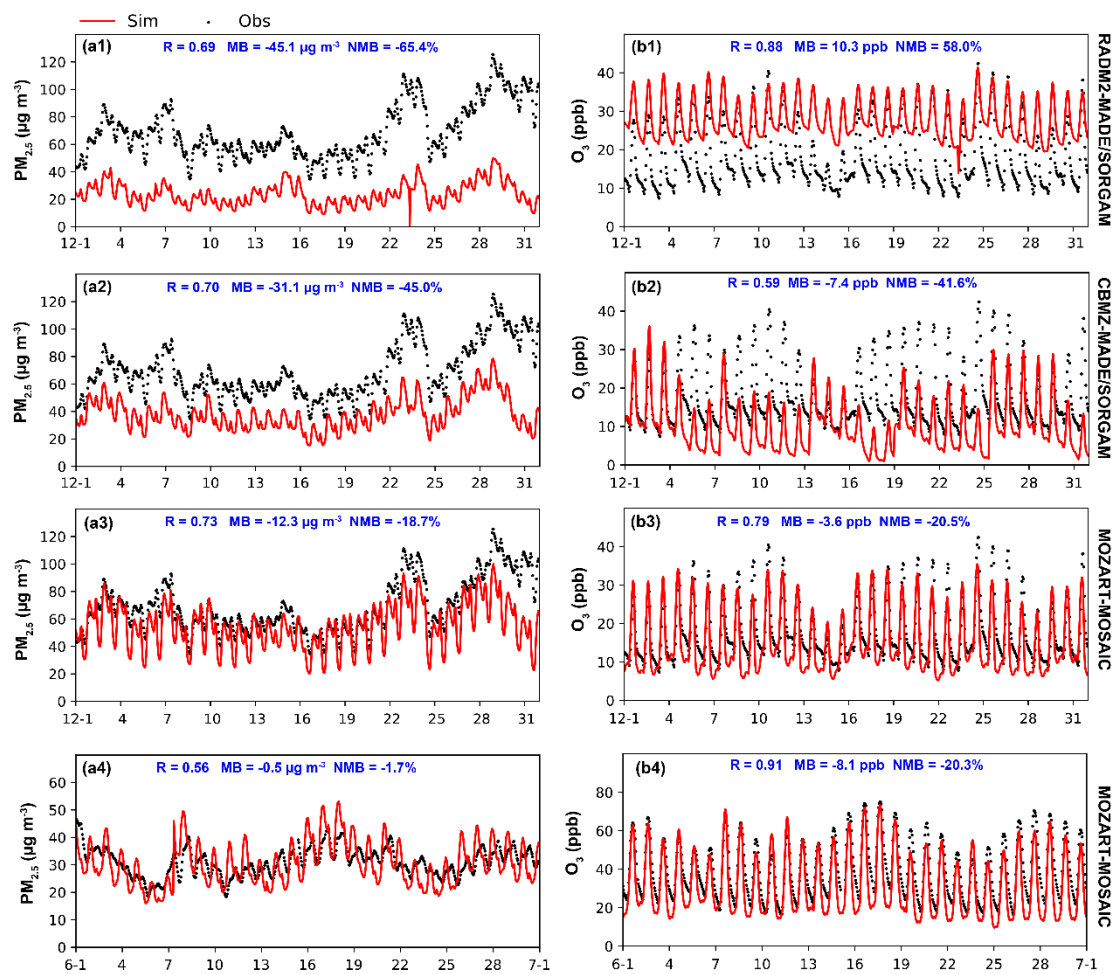

**Figure S11.** Time series of observed (black dots) and simulated (red lines) hourly **(a1-a4)** PM<sub>2.5</sub> and **(b1-b4)** O<sub>3</sub> concentrations averaged over the whole observation sites in eastern China during summer and winter 2017. **(a1, b1)** Simulated PM<sub>2.5</sub> and O<sub>3</sub> concentrations in winter 2017 by RADM2 gas-phase chemistry coupled with MADE/SORGAM aerosol module (RADM2-MADE/SORGAM). **(a2, b2)** Simulated PM<sub>2.5</sub> and O<sub>3</sub> concentrations in winter 2017 by CBMZ gas-phase chemistry coupled with MADE/SORGAM aerosol module (CBMZ-MADE/SORGAM). **(a3, b3)** Simulated PM<sub>2.5</sub> and O<sub>3</sub> concentrations in winter 2017 by MOZART gas-phase chemistry coupled with MOSAIC aerosol module (MOZART-MOSAIC). **(a4, b4)** is the same as **(a3, b3)**, but for summer 2017. The calculated correlation coefficient (R), mean bias (MB), and normalized mean bias (NMB) are also shown.



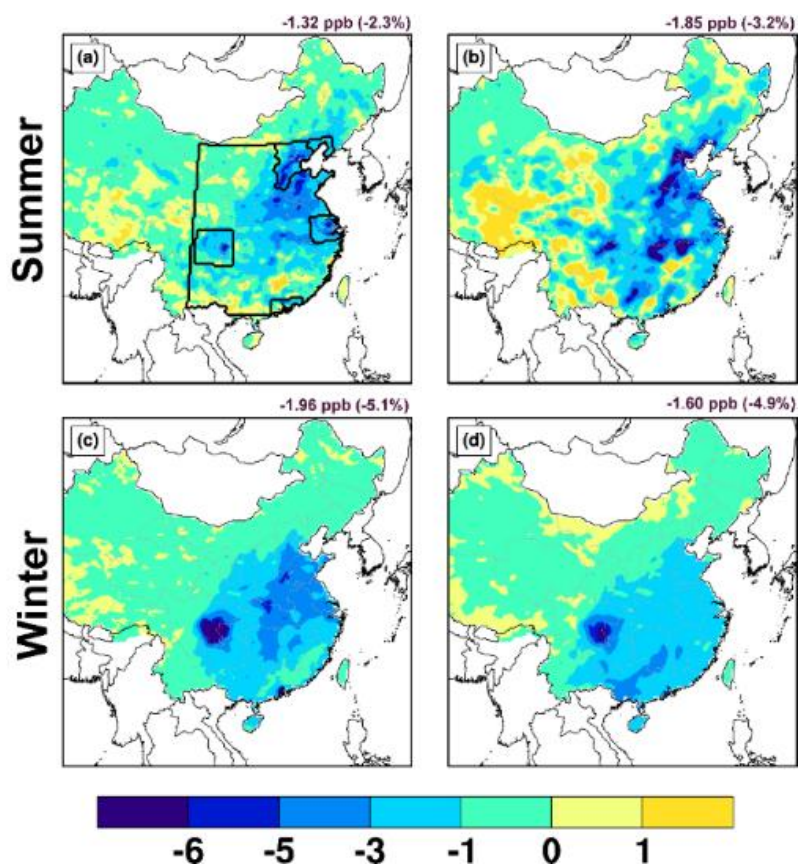

**Figure S12.** The effects of aerosol-radiation interaction on surface-layer MDA8 O<sub>3</sub> in summer (upper) and winter (bottom) calculated by (a, c) CBMZ-MOSAIC and (b, d) MOZART-MOSAIC mechanisms. The calculated changes (percentage changes) averaged over China are also shown at the top of each panel.

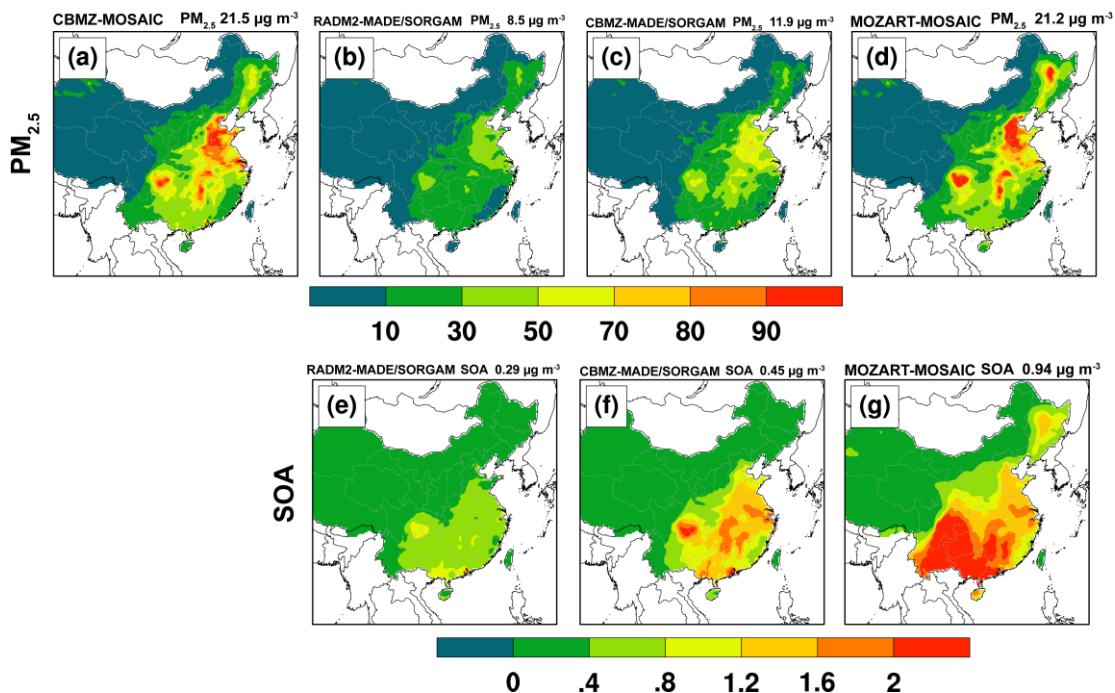

**Figure S13.** Spatial distributions of simulated mean  $PM_{2.5}$  and SOA concentrations ( $\mu g m^{-3}$ ) in winter 2017 by (a) CBMZ gas-phase chemistry coupled with MOSAIC aerosol module (CBMZ-MOSAIC), (b, e) RADM2 gas-phase chemistry coupled with MADE/SORGAM aerosol module (RADM2-MADE/SORGAM), (c, f) CBMZ gas-phase chemistry coupled with MADE/SORGAM aerosol module (CBMZ-MADE/SORGAM), and (d, g) MOZART gas-phase chemistry coupled with MOSAIC aerosol module (MOZART-MOSAIC). The calculated pollutant concentrations averaged over China are also shown at the top of each panel.



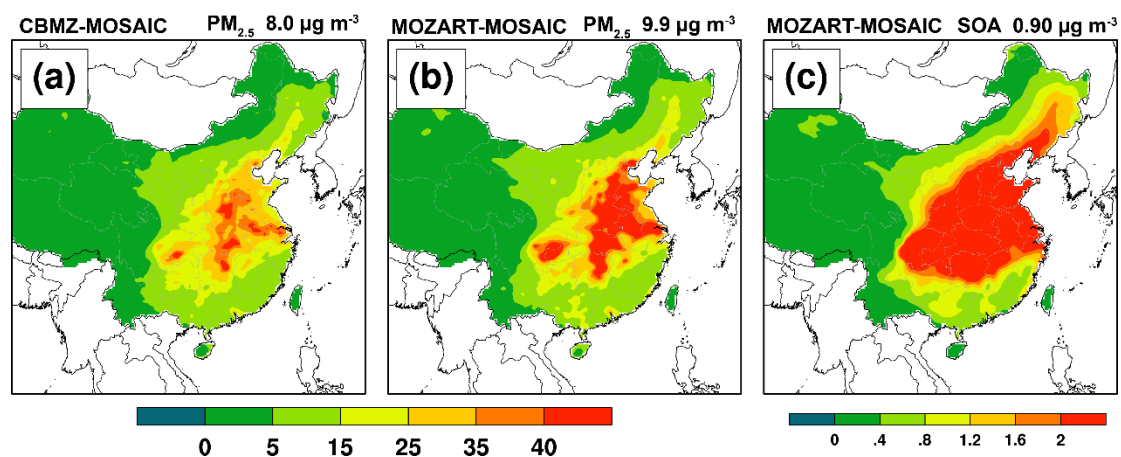

**Figure S14.** Spatial distributions of simulated mean PM<sub>2.5</sub> and SOA concentrations ( $\mu\text{g m}^{-3}$ ) in summer 2017 by (a) CBMZ gas-phase chemistry coupled with MOSAIC aerosol module (CBMZ-MOSAIC), (b, c) MOZART gas-phase chemistry coupled with MOSAIC aerosol module (MOZART-MOSAIC). The calculated pollutant concentrations averaged over China are also shown at the top of each panel.
